# Supplementary material for: Herbivory legacy modifies leaf economic spectrum and drought tolerance in two tree species
Source: Springer Nature journal article supplement (doi:10.1007/s00442-025-05678-4), 2025-02-01
Supplement: MOESM1 [file 442_2025_5678_MOESM1_ESM.pdf]

**Table S1:** Statistical analyses by response variable and associated predictors depending on measurement date. **T:** Treatment (Browsed and Unbrowsed); **S:** Species (*Ilex* and *Fagus*); **D:** Date (2018, 2019; LSP, MSU, LSU). **LSP:** Late spring. **MSU:** Mid-summer. **LSU:** Late summer. **S<sub>A</sub>/L<sub>A</sub>:** stem cross-sectional area to leaf area ratio. **SB:** shoot dry biomass. **R/S:** root-shoot ratio. **RD:** root depth. **RB:** root dry biomass.

| Response variable                                                               | Statistical analyses | Predictors    | 2018 |     |     | 2019 |     |     |
|---------------------------------------------------------------------------------|----------------------|---------------|------|-----|-----|------|-----|-----|
|                                                                                 |                      |               | LSP  | MSU | LSU | LSP  | MSU | LSU |
|                                                                                 | Linear               | T (x2) S      |      |     |     |      |     |     |
| Leaf water potential                                                            | mixed effect model   | (x2) D (x6)   | X    | X   | X   | X    | X   | X   |
|                                                                                 | Linear               | T (x2) S      |      |     |     |      |     |     |
| Photosynthetic parameters                                                       | mixed effect model   | (x2) D (x6)   | X    | X   | X   | X    | X   | X   |
|                                                                                 | Linear               | T (x2) S      |      |     |     |      |     |     |
| Biochemical measurements                                                        | mixed effect model   | (x2) D (x6)   | X    | X   | X   | X    | X   | X   |
|                                                                                 | Linear               | T (x2) S      |      |     |     |      |     |     |
| Pressure-volume curves                                                          | mixed effect model   | (x2) D (x2)   |      |     | X   |      |     | X   |
|                                                                                 | Linear               | T (x2) S      |      |     |     |      |     |     |
| Biomass (S <sub>A</sub> /L <sub>A</sub> , SB) and shoot anatomical measurements | Two-way linear model | T (x2) S (x2) |      |     |     |      |     | X   |
|                                                                                 | One-way linear model | T (x2)        |      |     |     |      |     | X   |
| Biomass (R/S, RD, RB) and root anatomical measurements                          |                      |               |      |     |     |      |     |     |
